# Supplementary material for: The Combined Effects of Animal Products Intake and Physical Activity With Cause-specific and All-cause Mortality Among Patients With Type 2 Diabetes Mellitus in China: A Prospective Cohort Study
Source: Research Square preprint supplement (doi:10.21203/rs.3.rs-1210165/v1), 2022-01-03
Supplement: Supplementary file 1 [file cf0e6cea42b468de6ccbf948.docx]

**Supplementary Table1** Hazard ratios of the combined effect of quartiles of red meat, poultry, aquatic product, egg consumption and physical activity.

|  | **Unadjusted OR (95%CI)** | ***P*** | **Adjusted OR (95%CI)** | ***P*** |
| --- | --- | --- | --- | --- |
| **All-cause mortality** |  |  |  |  |
| **Red meat** |  |  |  |  |
| Low+Q1 | 1.00 |  | 1.00 |  |
| Low+Q2 | 0.86(0.65,1.14) | 0.287 | 0.84(0.64,1.11) | 0.222 |
| Low+Q2 | 0.98(0.72,1.33) | 0.882 | 1.22(0.90,1.67) | 0.207 |
| Low+Q2 | 0.73(0.52,1.02) | 0.065 | 0.93(0.66,1.31) | 0.681 |
| Moderate+Q1 | 0.72(0.52,0.98) | 0.037 | 0.83(0.60,1.13) | 0.234 |
| Moderate+Q2 | 0.58(0.43,0.79) | 0.000 | 0.67(0.49,0.91) | 0.011 |
| Moderate+Q3 | 0.70(0.50,0.98) | 0.037 | 0.98(0.70,1.38) | 0.928 |
| Moderate+Q4 | 0.39(0.26,0.59) | <0.001 | 0.58(0.37,0.84) | 0.005 |
| High+Q1 | 0.62(0.44,0.85) | 0.004 | 0.80(0.58,1.11) | 0.186 |
| High+Q2 | 0.42(0.30,0.59) | <0.001 | 0.62(0.44,0.88) | 0.007 |
| High+Q3 | 0.31(0.20,0.49) | <0.001 | 0.51(0.33,0.80) | 0.004 |
| High+Q4 | 0.28(0.18,0.44) | <0.001 | 0.48(0.31,0.74) | 0.001 |
| **Poultry** |  |  |  |  |
| Low+Q1 | 1.00 |  | 1.00 |  |
| Low+Q2 | 0.86(0.65,1.12) | 0.262 | 0.92(0.70,1.21) | 0.530 |
| Low+Q2 | 0.75(0.55,1.01) | 0.060 | 0.89(0.65,1.22) | 0.473 |
| Low+Q2 | 0.53(0.38,0.74) | <0.001 | 0.68(0.48,0.97) | 0.031 |
| Moderate+Q1 | 0.79(0.59,1.05) | 0.102 | 0.88(0.66,1.18) | 0.388 |
| Moderate+Q2 | 0.54(0.37,0.68) | <0.001 | 0.67(0.49,0.91) | 0.010 |
| Moderate+Q3 | 0.37(0.26,0.54) | <0.001 | 0.51(0.35,0.75) | 0.001 |
| Moderate+Q4 | 0.47(0.32,0.67) | <0.001 | 0.62(0.43,0.91) | 0.013 |
| High+Q1 | 0.57(0.41,0.79) | 0.001 | 0.85(0.61,0.18) | 0.328 |
| High+Q2 | 0.34(0.24,0.48) | <0.001 | 0.51(0.35,0.73) | <0.001 |
| High+Q3 | 0.30(0.21,0.45) | <0.001 | 0.48(0.33,0.72) | <0.001 |
| High+Q4 | 0.28(0.19,0.43) | <0.001 | 0.45(0.29,0.69) | <0.001 |
| **Aquatic products** |  |  |  |  |
| Low+Q1 | 1.00 |  | 1.00 |  |
| Low+Q2 | 0.97(0.72,1.30) | 0.826 | 0.96(0.71,1.29) | 0.775 |
| Low+Q2 | 0.74(0.56,0.97) | 0.030 | 0.86(0.65,1.15) | 0.310 |
| Low+Q2 | 0.73(0.53,1.02) | 0.066 | 0.89(0.64,1.25) | 0.499 |
| Moderate+Q1 | 0.70(0.52,0.94) | 0.016 | 0.76(0.57,1.02) | 0.070 |
| Moderate+Q2 | 0.54(0.38,0.76) | <0.001 | 0.67(0.47,0.95) | 0.023 |
| Moderate+Q3 | 0.58(0.43,0.78) | <0.001 | 0.77(0.57,1.04) | 0.087 |
| Moderate+Q4 | 0.43(0.29,0.64) | <0.001 | 0.61(0.41,0.91) | 0.015 |
| High+Q1 | 0.54(0.40,0.75) | <0.001 | 0.80(0.58,1.10) | 0.165 |
| High+Q2 | 0.43(0.30,0.63) | <0.001 | 0.57(0.39,0.82) | 0.003 |
| High+Q3 | 0.34(0.24,0.48) | <0.001 | 0.55(0.38,0.79) | 0.001 |
| High+Q4 | 0.25(0.15,0.40) | <0.001 | 0.40(0.24,0.65) | <0.001 |
| **Eggs** |  |  |  |  |
| Low+Q1 | 1.00 |  | 1.00 |  |
| Low+Q2 | 0.80(0.60,1.06) | 0.117 | 0.90(0.68,1.19) | 0.453 |
| Low+Q2 | 0.79(0.60,1.04) | 0.087 | 0.97(0.73,1.29) | 0.840 |
| Low+Q2 | 0.96(0.60,1.54) | 0.874 | 1.16(0.72,1.87) | 0.547 |
| Moderate+Q1 | 0.63(0.46,0.87) | 0.004 | 0.78(0.57,1.08) | 0.137 |
| Moderate+Q2 | 0.61(0.46,0.82) | 0.001 | 0.86(0.64,1.15) | 0.310 |
| Moderate+Q3 | 0.49(0.36,0.68) | <0.001 | 0.66(0.47,0.91) | 0.012 |
| Moderate+Q4 | 0.51(0.29,0.91) | 0.023 | 0.52(0.29,0.93) | 0.028 |
| High+Q1 | 0.41(0.28,0.59) | <0.001 | 0.65(0.45,0.93) | 0.020 |
| High+Q2 | 0.41(0.30,0.57) | <0.001 | 0.63(0.45,0.87) | 0.006 |
| High+Q3 | 0.35(0.24,0.50) | <0.001 | 0.58(0.40,0.83) | 0.003 |
| High+Q4 | 0.45(0.25,0.82) | 0.009 | 0.66(0.36,1.22) | 0.185 |
| **CVD mortality** |  |  |  |  |
| **Red meat** |  |  |  |  |
| Low+Q1 | 1.00 |  | 1.00 |  |
| Low+Q2 | 0.91(0.59,1.42 | 0.685 | 0.88(0.57,1.37) | 0.582 |
| Low+Q2 | 0.87(0.53,1.45 | 0.604 | 1.17(0.70,1.97) | 0.543 |
| Low+Q2 | 0.78(0.46,1.31 | 0.349 | 1.04(0.61,1.77) | 0.894 |
| Moderate+Q1 | 0.66(0.39,1.10 | 0.112 | 0.80(0.48,1.35) | 0.411 |
| Moderate+Q2 | 0.51(0.30,0.84 | 0.008 | 0.60(0.36,1.00) | 0.050 |
| Moderate+Q3 | 0.55(0.31,0.99 | 0.046 | 0.80(0.44,1.45) | 0.465 |
| Moderate+Q4 | 0.42(0.23,0.79 | 0.007 | 0.70(0.35,1.27) | 0.217 |
| High+Q1 | 0.42(0.23,0.77 | 0.005 | 0.58(0.32,1.06) | 0.079 |
| High+Q2 | 0.40(0.23,0.70 | 0.001 | 0.66(0.38,1.17) | 0.157 |
| High+Q3 | 0.27(0.13,0.57 | 0.001 | 0.53(0.25,1.15) | 0.109 |
| High+Q4 | 0.20(0.09,0.45 | <0.001 | 0.39(0.17,0.88) | 0.024 |
| **Poultry** |  |  |  |  |
| Low+Q1 | 1.00 |  | 1.00 |  |
| Low+Q2 | 0.93(0.60,1.43 | 0.734 | 0.99(0.64,1.53) | 0.972 |
| Low+Q2 | 0.74(0.45,1.21 | 0.229 | 0.84(0.50,1.39) | 0.492 |
| Low+Q2 | 0.53(0.30,0.91 | 0.022 | 0.69(0.40,1.22) | 0.200 |
| Moderate+Q1 | 0.64(0.39,1.05 | 0.077 | 0.75(0.45,1.23) | 0.253 |
| Moderate+Q2 | 0.47(0.28,0.77 | 0.003 | 0.64(0.39,1.06) | 0.086 |
| Moderate+Q3 | 0.33(0.18,0.63 | 0.001 | 0.47(0.25,0.90) | 0.023 |
| Moderate+Q4 | 0.50(0.28,0.88 | 0.017 | 0.67(0.37,1.21) | 0.182 |
| High+Q1 | 0.45(0.25,0.80 | 0.006 | 0.71(0.40,1.27) | 0.253 |
| High+Q2 | 0.33(0.18,0.59 | <0.001 | 0.54(0.30,0.99) | 0.046 |
| High+Q3 | 0.19(0.09,0.41 | <0.001 | 0.34(0.16,0.74) | 0.006 |
| High+Q4 | 0.25(0.12,0.50 | <0.001 | 0.42(0.20,0.87) | 0.019 |
| **Aquatic products** |  |  |  |  |
| 1.00 | 1.00 |  | 1.00 |  |
| Low+Q2 | 0.82(0.50,1.33) | 0.413 | 0.83(0.51,1.35) | 0.447 |
| Low+Q2 | 0.72(0.47,1.11) | 0.134 | 0.88(0.57,1.36) | 0.553 |
| Low+Q2 | 0.55(0.31,0.97) | 0.038 | 0.64(0.36,1.13) | 0.122 |
| Moderate+Q1 | 0.60(0.38,0.96) | 0.032 | 0.69(0.43,1.10) | 0.119 |
| Moderate+Q2 | 0.41(0.23,0.75) | 0.003 | 0.52(0.29,0.94) | 0.030 |
| Moderate+Q3 | 0.49(0.30,0.79) | 0.003 | 0.67(0.41,1.09) | 0.106 |
| Moderate+Q4 | 0.33(0.17,0.64) | 0.001 | 0.49(0.24,0.97) | 0.042 |
| High+Q1 | 0.38(0.22,0.66) | 0.001 | 0.62(0.35,1.08) | 0.089 |
| High+Q2 | 0.41(0.23,0.73) | 0.003 | 0.60(0.34,1.07) | 0.084 |
| High+Q3 | 0.21(0.11,0.41) | <0.001 | 0.38(0.20,0.74) | 0.004 |
| High+Q4 | 0.16(0.06,0.40) | <0.001 | 0.29(0.11,0.72) | 0.008 |
| **Eggs** |  |  |  |  |
| Low+Q1 | 1.00 |  | 1.00 |  |
| Low+Q2 | 0.72(0.46,1.13) | 0.152 | 0.81(0.51,1.28) | 0.366 |
| Low+Q2 | 0.74(0.48,1.14) | 0.170 | 0.93(0.59,1.46) | 0.748 |
| Low+Q2 | 1.24(0.64,2.42) | 0.529 | 1.58(0.80,3.11) | 0.190 |
| Moderate+Q1 | 0.56(0.33,0.94) | 0.028 | 0.74(0.44,1.26) | 0.266 |
| Moderate+Q2 | 0.56(0.35,0.90) | 0.017 | 0.83(0.51,1.33) | 0.437 |
| Moderate+Q3 | 0.40(0.23,0.68) | 0.001 | 0.56(0.32,0.97) | 0.038 |
| Moderate+Q4 | 0.29(0.09,0.94) | 0.039 | 0.27(0.08,0.90) | 0.033 |
| High+Q1 | 0.37(0.20,0.67) | 0.001 | 0.65(0.35,1.18) | 0.156 |
| High+Q2 | 0.27(0.15,0.48) | <0.001 | 0.45(0.25,0.82) | 0.009 |
| High+Q3 | 0.28(0.15,0.51) | <0.001 | 0.52(0.28,0.97) | 0.041 |
| High+Q4 | 0.37(0.13,1.02) | 0.055 | 0.61(0.21,1.71) | 0.344 |
| **Cancer mortality** |  |  |  |  |
| **Red meat** |  |  |  |  |
| Low+Q1 | 1.00 |  | 1.00 |  |
| Low+Q2 | 0.77(0.44,1.35) | 0.359 | 0.78(0.44,1.37) | 0.383 |
| Low+Q2 | 0.87(0.47,1.62) | 0.664 | 1.04(0.55,1.95) | 0.902 |
| Low+Q2 | 0.96(0.52,1.74) | 0.883 | 1.08(0.58,1.98) | 0.815 |
| Moderate+Q1 | 0.65(0.34,1.22) | 0.178 | 0.76(0.40,1.45) | 0.408 |
| Moderate+Q2 | 0.54(0.29,0.99) | 0.046 | 0.63(0.34,1.17) | 0.140 |
| Moderate+Q3 | 1.09(0.61,0.94) | 0.772 | 1.42(0.79,2.55) | 0.241 |
| Moderate+Q4 | 0.39(0.18,0.86) | 0.020 | 0.48(0.21,1.07) | 0.072 |
| High+Q1 | 0.89(0.50,1.58) | 0.688 | 1.12(0.63,2.00) | 0.706 |
| High+Q2 | 0.64(0.35,1.16) | 0.138 | 0.91(0.50,1.67) | 0.762 |
| High+Q3 | 0.20(0.07,0.58) | 0.003 | 0.31(0.11,0.88) | 0.029 |
| High+Q4 | 0.57(0.29,1.10) | 0.093 | 0.81(0.41,1.60) | 0.544 |
| **Poultry** |  |  |  |  |
| Low+Q1 | 1.00 |  | 1.00 |  |
| Low+Q2 | 0.79(0.46,1.37) | 0.404 | 0.81(0.47,1.40) | 0.452 |
| Low+Q2 | 0.83(0.47,1.48) | 0.531 | 0.88(0.49,1.58) | 0.662 |
| Low+Q2 | 0.52(0.27,1.02) | 0.058 | 0.56(0.28,1.11) | 0.096 |
| Moderate+Q1 | 0.87(0.50,1.51) | 0.614 | 0.94(0.54,1.64) | 0.828 |
| Moderate+Q2 | 0.41(0.22,0.77) | 0.006 | 0.50(0.26,0.96) | 0.036 |
| Moderate+Q3 | 0.54(0.28,1.03) | 0.061 | 0.66(0.34,0.27) | 0.212 |
| Moderate+Q4 | 0.56(0.28,1.09) | 0.086 | 0.63(0.32,0.15) | 0.184 |
| High+Q1 | 0.83(0.47,0.47) | 0.528 | 1.18(0.67,2.11) | 0.566 |
| High+Q2 | 0.33(0.16,0.67) | 0.002 | 0.43(0.21,0.89) | 0.024 |
| High+Q3 | 0.43(0.22,0.84) | 0.013 | 0.59(0.30,1.17) | 0.129 |
| High+Q4 | 0.61(0.33,1.14) | 0.119 | 0.80(0.43,1.52) | 0.503 |
| **Aquatic products** |  |  |  |  |
| Low+Q1 | 1.00 |  | 1.00 |  |
| Low+Q2 | 1.65(0.91,3.01) | 0.100 | 1.57(0.86,2.87) | 0.141 |
| Low+Q2 | 1.05(0.58,1.90) | 0.868 | 1.14(0.63,2.07) | 0.662 |
| Low+Q2 | 0.44(0.77,2.69) | 0.249 | 1.55(0.82,2.91) | 0.178 |
| Moderate+Q1 | 0.83(0.44,1.58) | 0.565 | 0.88(0.46,1.67) | 0.692 |
| Moderate+Q2 | 1.03(0.53,1.98) | 0.937 | 1.25(0.64,2.41) | 0.514 |
| Moderate+Q3 | 0.95(0.52,1.73) | 0.863 | 0.13(0.62,2.08) | 0.686 |
| Moderate+Q4 | 0.68(0.32,1.48) | 0.336 | 0.87(0.40,1.91) | 0.729 |
| High+Q1 | 1.25(0.70,2.23) | 0.448 | 1.70(0.95,3.06) | 0.075 |
| High+Q2 | 0.64(0.30,1.35) | 0.243 | 0.78(0.37,0.66) | 0.525 |
| High+Q3 | 0.68(0.35,1.30) | 0.241 | 0.98(0.50,0.91) | 0.948 |
| High+Q4 | 0.60(0.27,1.34) | 0.212 | 0.82(0.36,1.85) | 0.628 |
| **Eggs** |  |  |  |  |
| Low+Q1 | 1.00 |  | 1.00 |  |
| Low+Q2 | 1.03(0.58,1.81) | 0.932 | 1.09(0.62,1.94) | 0.758 |
| Low+Q2 | 1.00(0.57,1.75) | 1.000 | 1.10(0.62,1.94) | 0.744 |
| Low+Q2 | 0.15(0.40,2.78) | 0.924 | 1.18(0.44,3.14) | 0.748 |
| Moderate+Q1 | 0.80(0.42,1.52) | 0.496 | 0.97(0.51,1.85) | 0.935 |
| Moderate+Q2 | 0.75(0.41,1.35) | 0.334 | 0.95(0.52,1.74) | 0.875 |
| Moderate+Q3 | 0.74(0.40,1.36) | 0.328 | 0.88(0.47,1.64) | 0.689 |
| Moderate+Q4 | 0.36(0.09,1.54) | 0.169 | 0.36(0.08,1.53) | 0.166 |
| High+Q1 | 0.87(0.47,1.62) | 0.662 | 1.27(0.68,2.38) | 0.456 |
| High+Q2 | 0.73(0.40,1.33) | 0.299 | 0.98(0.54,1.80) | 0.949 |
| High+Q3 | 0.45(0.22,0.90) | 0.025 | 0.65(0.32,1.34) | 0.246 |
| High+Q4 | 0.68(0.24,1.99) | 0.486 | 0.88(0.30,2.59) | 0.813 |

Adjusted model: Adjusted for age, duration of diabetes, gender, marital status, level of education, household income, HbA1c, frequency of smoking, frequency of drinking, hypertension, dyslipidemia, coronary heart disease, kidney diseases, overweight or obesity and sleep duration.
